# Supplementary material for: Design and fabrication of recombinant reflectin-based Bragg reflectors: bio-design engineering and photoisomerism induced wavelength modulation
Source: bioRxiv or medRxiv preprint supplement (doi:10.1101/2020.02.11.942110), 2020-02-12
Supplement: Supplementary file [file media-1.pdf]

## Supporting Information

### **Reflectin 1A [Euprymna scolopes] AAQ21389:**

MNRFMNRYRPFNNMYSNMYRGRYRGMM**EPMSRMTMDFQGRYMDSQGRM**VDPRIYDYYGRFNDYD  
RYYGRSMFNYGWMMMDGDRYNRYNRW**MDYPERYMDMSGYQMDMSGRWMDMQGRH**CNPYSQWMM  
YNYNRHGYYPNYSYGRHMFYPERW**MDMSNYSMDMYGRYMDRWGRY**CNPFSSQYMNYYGRYWNYPGYN  
NYYYSRNMYPERY**FDMSNWQMDMQGRWMDNQGRY**CSPYWNNWYGRHMYYPYQNNYFYGRYDYPG  
**MDYSNYQMDMQGRYMDQYGMND**YYY

### **Reflectin 2A [Euprymna scolopes] AAQ21392:**

MNRYMTRFRNFYGNMYRGRYRGMM**EPMSRMTMDFQGRYMDSQGRM**VDPRIYDYYGRYNDYDRYYGRS  
MFNYGWMMMDGDRYNRYNRW**MDFPERYMDMSGYQMDMYGRWMDMQGRH**CNPYSQMMYNYNRHG  
YYPNYSYGRHMFYPERW**MDMSNYSMDMYGRYMDRWGRY**CNPFYQFYNHWNRYGNYPGYNNYYMYYP  
ERY**FDMSNWQMDMQGRWMDMQGRY**CSPYWYNWYGRHMYYPYQNYWYGRYDYPG**MDYSNWQMD**  
**MQGRWMDMQGRYMDYPYNYN**WY

### **Sequence 46 (reflectin 2D) [Euprymna Scolopes] US 7314735 ABZ24324:**

MNRYMNRFRNFYGNMYRGRYRGMM**EPMSRMTMDFQGRYMDSQGRM**VDPRIYDYYGRFNDYDRYYGR  
SMFNYGWMMMDGDRYNRYNRW**MDFPERYMDMSGYQMDMYGRWMDMQGRH**CNPYSQWMMYNYN  
RHGYYPNYSYGRHMFYPERW**MDMSNYSMDMYGRYMDRWGRY**CNPFYQFYNHWNRYGNYPGYSSYYM  
YPERY**FDMSNWQMDMQGRWMDMQGRY**CSPYWYNWYGRHMYYPYQNYWYGRYDYPG**MDYSNWQ**  
**MDMQGRWMDMQGRYMDYPYNYN**WNH

### **Reflectin 1 [Sepia officinalis] CCG28037:**

MNRYMMRNRPMYGNMYRTGKKYRGV**MEPMSRMTMDFQGRYMDSQGRM**VDPRIYDYYGRWNDYDR  
YYGRSMFNYPHMDGHQHGGW**MDFPERWMDMSNYQMDMQGRWMDMQGRH**CQPFNQWGYNRH  
GNYPSSYYGRN**MFYPERWMDMSNWQMDTQGRWMDMQGRY**GSPFNQWGYNRHGYYPGSSYGRNMY  
H**PERWMDMSNYQMDMQGRWMDMHGRH**VNPFSSHSMHGRNWSYPYNYSSRH**MDYPERNMDMSN**  
**WQMDMQGRWMDMQGRHMDPSWSN**MHDNHNYWF

### **Reflectin A2 [Doryteuthis opalescens] KF661516:**

MNRYMMRHRPMSNMYRTGRKYRGV**MEPMSRMTMDFQGRYMDSQGRM**VDPRIYDYYGRCHDYDRYNG  
RSMFNNGPYMDGQRYGGW**MDFPERYMDMSGYQMDMHGRWMDSQGRY**CNPMGHSWSNRQGYYPGS  
NYGRNMFNPERY**MDMSGYQMDMQGRWMDMGGRH**VNPFSSHSMYGRNMFNPSYFSNRH**MDNPERYM**  
**DMSGYQMDMQGRWMDTQGRYMDPSMSN**MYDNYNYWY

**Figure S1** Name, origin, UniProt ID, and amino-acid sequence of all reflectin isoforms used in this study. Repeating motif regions are highlighted bold.

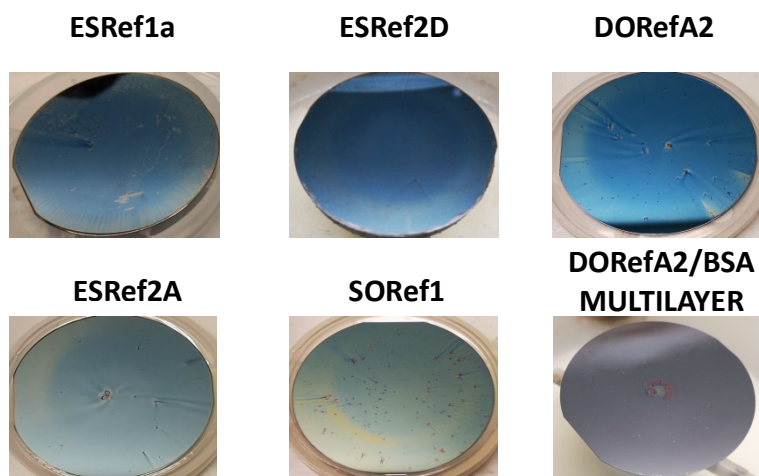

**Figure S2** Optical images of reflectin thin-films following fabrication by spin coating 1% w/w reflectin in HFIP onto a clean Si wafer. Camera images were taken following drying. DORefA2/BSA multilayer films were fabricated by spin coating reflectin and BSA sequentially.

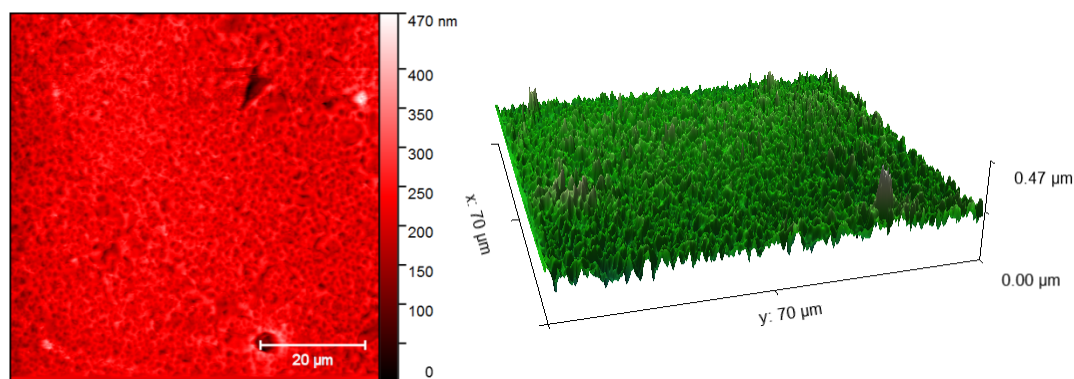

**Figure S3** Representative atomic force microscopy (AFM) images of a DORefA2 thin-film fabricated by spin coating 1% w/w DORefA2 in HFIP onto a clean Si wafer. AFM data was processed using the Gwyddion software package, <http://gwyddion.net/>.

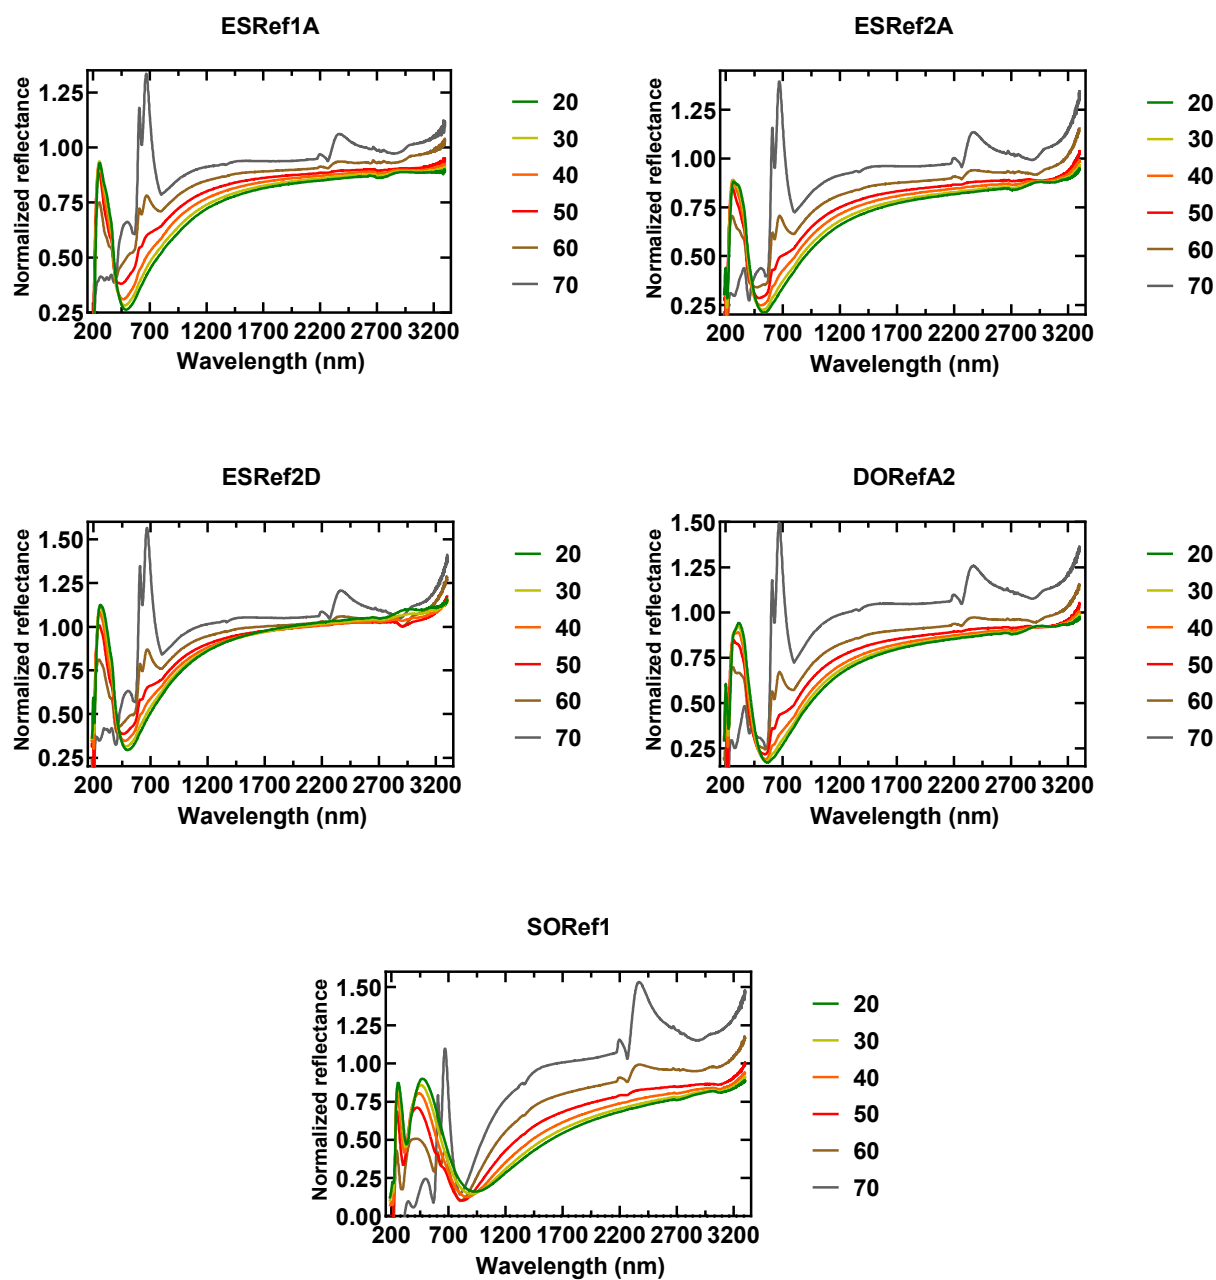

**Figure S4** UV-Vis-NIR reflectance spectra (185-3300 nm) of reflectin-based single-layer films fabricated by spin coating 1% w/w reflectin in HFIP onto clean Si wafers. The angle of incidence was varied between 20-70 degrees (10 degree intervals).

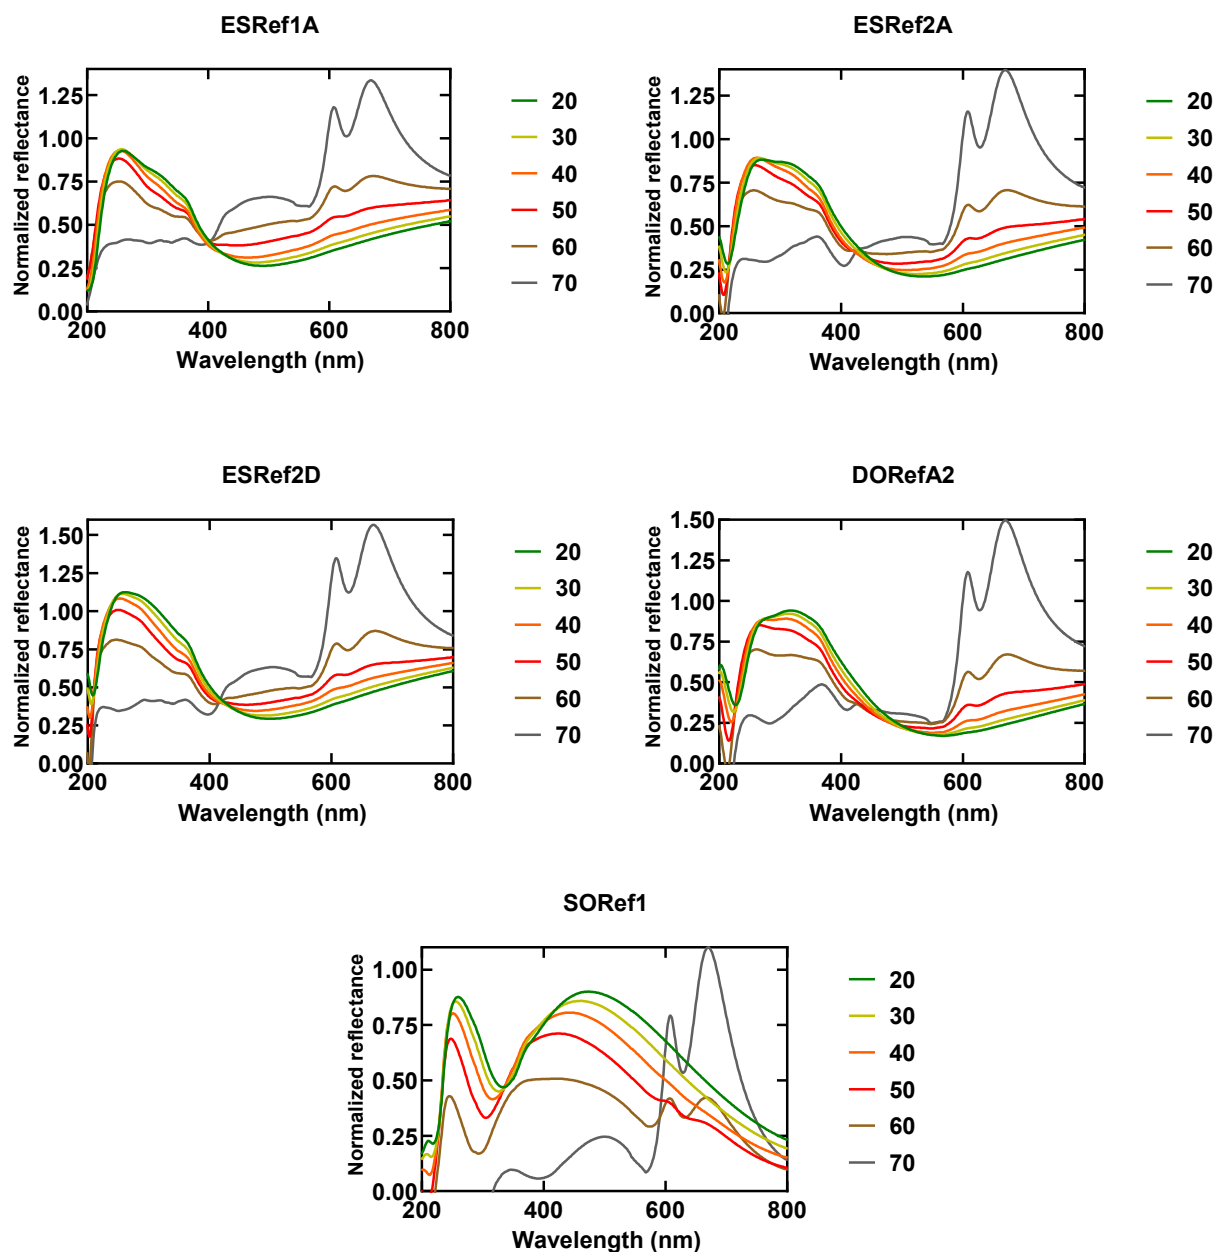

**Figure S5** UV-Vis reflectance spectra (200-800 nm) of reflectin-based single-layer films fabricated by spin coating 1% w/w re flectin in HFIP onto clean Si wafers. The angle of incidence was varied between 20-70 degrees (10 degree intervals).

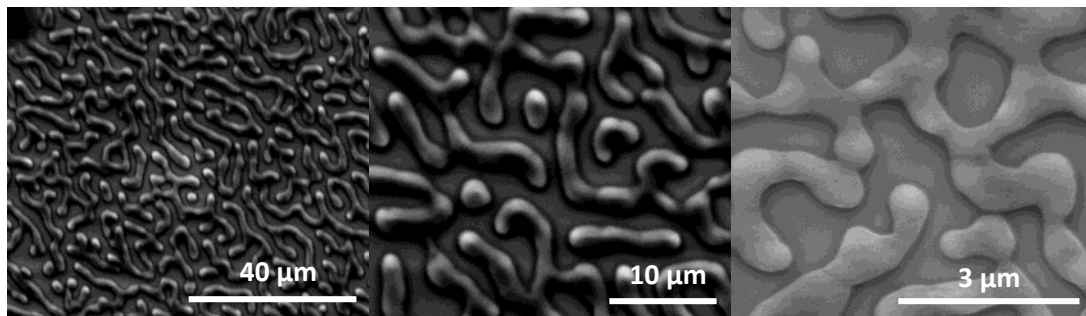

**Figure S6** Representative SEM micrographs of the surface of a reflectin thin-film fabricated by sping coating 1% w/w reflectin in HFIP onto a clean Si wafer.

**Agrobacterium fabrum PHY1:**

MSSHTPKLDSCGAEPIHIPGAIQEHGALLVLSAREFSVVQASDNLANYIGVDLPIGAVATEA  
 NLPFISVLSAWYSGEESNFRYAWAEKKLDVSAHRSGTLVILEVEKAGVGESAEKLMGELTS  
 LAKYLNSAPSLEDALFRTAQLVSSISGHDRTLIYDFGLDWSGHVVAEAGSGALPSYLGLRF  
 PAGDIPPQARQLYTINRLRMIPDVVDYKPVPIRPEVNAETGAVLDMFSFQLRSVSPVHLEYMR  
 NMGTAASMSVSIVVNGALWGLIACHHATPHSVSLAVREACDFAAQLLSMRIAMEQSSQD  
 ASRRVELGHIQARLLKGMAAAEKWVDGLLGGEREDLLKQVGADGAALVLGDDYELV  
 GNTPSREQVEELILWGEREIADVAFATDNLAGNYPTAAAYASVASGIIAMRVSELHGSLI  
 WFRPEVIKTVRWGGDPHKTQESGRIHPRKSFEIWKEQLRNTSFPWSEPELAAARELRGAI  
 GIVLRKTEEMADLTRELQRTNKELEAFSFSVSHDLRAPFRHIVGFAQLLRERSDALDEKSL  
 HYLQMISEAALGAGRLVDDLLNFSQLGRTQLTLKPVDMQKVVSEVRRSLSHAVSDRQIEW  
 RIGALPVIFGDPTLLRQVWYNLIENAIKYSSREPVSIIITISAVETEDDVTYSVEDNGVGFDMA  
 YYNKLFGVFQRLQRVEDFEGTGIGLALVRRIVERHHGLVGAEGTVGEGATFSFTLPVTKVE  
 EEKIA

**Figure S7** Amino acid sequence of phytochrome 1 from *Agrobacterium fabrum* used in this study.
